# Supplementary material for: Chemically-resolved aerosol volatility measurements from two megacity field studies
Source: Copernicus journal article supplement (doi:10.5194/acp-9-7161-2009), 2009-09-28
Supplement: Supplementary file [file acp-9-7161-2009-supplement.pdf]

1 **SUPPLEMENTARY INFORMATION FOR:**

2  
3 **Chemically-Resolved Aerosol Volatility Measurements from Two Megacity Field**  
4 **Studies**

5  
6 J.A. Huffman<sup>1,2,3\*</sup>, K.S. Docherty<sup>1, 2</sup>, A.C. Aiken<sup>1,2</sup>, M.J. Cubison<sup>1</sup>, I.M. Ulbrich<sup>1,2</sup>, P.F.  
7 DeCarlo<sup>1,4</sup>, D. Sueper<sup>1,5</sup>, J.T. Jayne<sup>5</sup>, D.R. Worsnop<sup>5</sup>, P.J. Ziemann<sup>6</sup> and J.L. Jimenez<sup>1,2#</sup>

8  
9 <sup>1</sup>Cooperative Institute for Research in Environmental Sciences (CIRES), Boulder,  
10 Colorado

11 <sup>2</sup>Department of Chemistry and Biochemistry, University of Colorado, Boulder, Colorado  
12 PSI

13 <sup>3</sup>Now at Max Planck Institute for Chemistry, Mainz, Germany

14 <sup>4</sup>Now at Paul Scherrer Institute (PSI), Villigen, Switzerland

15 <sup>5</sup>Aerodyne Research, Inc., Billerica, MA

16 <sup>6</sup>Air Pollution Research Center, University of California-Riverside

17  
18 \* Corresponding author: [alex.huffman@colorado.edu](mailto:alex.huffman@colorado.edu)

19 # Corresponding author: [jose.jimenez@colorado.edu](mailto:jose.jimenez@colorado.edu), +1-303-492-3557

20

21 **Appendix A**

22 List of terms and acronyms:

23 **OA:** Total organic aerosol comprised of multiple components (POA, SOA, etc.)

24 **POA:** Primary organic aerosol emitted into the atmosphere directly into the particle  
25 phase

26 **SOA:** Secondary organic aerosol created by chemical reactions leading to a decrease in  
27 species volatility and increased partitioning to the particle phase

28 **HOA:** Hydrocarbon-like organic aerosol estimated from factor analysis of AMS spectra.  
29 Composed of reduced species, and typically dominated by combustion emissions. HOA  
30 is typically used as a surrogate of POA due to the similarity of its spectra with those from  
31 primary sources, and the strong correlation of its time series with those of primary tracers  
32 (CO, NO<sub>x</sub>, EC, etc.) (Zhang et al., 2005a; Zhang et al., 2005b; Lanz et al., 2007; Aiken et  
33 al., 2008; Ulbrich et al., 2009).

34 **OOA:** Oxygenated organic aerosol estimated from factor analysis of AMS spectra. HOA  
35 is typically used as a surrogate of SOA due to the similarity of its spectra with those from  
36 chamber SOA, and the correlation of its time series with those of secondary tracers  
37 (ozone, Ox, ammonium nitrate, ammonium chloride, ammonium sulfate, etc.) (Zhang et  
38 al., 2005a; Zhang et al., 2005b; Lanz et al., 2007; Aiken et al., 2008; Ulbrich et al., 2009).

39 **OOA-1:** More aged and oxygenated, less volatile fraction of OOA, estimated from factor  
40 analysis of AMS spectra in several studies (Lanz et al., 2007; Aiken et al., 2008; Nemitz  
41 et al., 2008; Ulbrich et al., 2009).

42 **OOA-2:** Less aged and oxygenated, more volatile fraction of OOA, estimated from factor  
43 analysis of AMS spectra in several studies.

44 **BBOA:** Biomass burning organic aerosol. In Mexico City BBOA originated mostly from  
45 wildfire and agricultural burning, but wood-fired stoves can also be important in the  
46 winter at some locations (Lanz et al., 2007).

47 **LOA:** Local organic aerosol. So named because it is characterized by short (<10 min)  
48 spikes of aerosol concentration that indicates a local source. Separated by PMF in both  
49 SOAR-1 and MILAGRO campaigns.

50 **VOC:** Volatile organic compound, existing in the atmosphere primarily as gas.

51 **IVOC:** Intermediate-volatility organic compound, with volatility just above that of  
52 undiluted POA (Robinson et al., 2007).

53 **SVOC:** Semi-volatile organic compound, which may be of primary origin (evaporated  
54 POA material (Robinson et al., 2007)) of secondary origin.

55 **Figure Captions**

56

57 **Figure S1:** Average size distributions at each TD temperature for SMPS and AMS  
58 instruments in SOAR-1 and MILAGRO. Panels (a-b) show normalized SMPS mobility  
59 size distributions as  $dV_d/d\log d_m$  in  $\text{nm}^3/\text{cm}^3$ . Panels (c-d) show AMS vacuum  
60 aerodynamic distributions in  $\mu\text{g}/\text{m}^3$ .

61

62 **Figure S2:** Thermograms for additional ions for SOAR-1 and MILAGRO. Panel (a)  
63 shows nitrogen-containing ions:  $\text{CH}_4\text{N}^+$ ,  $\text{C}_3\text{H}_8\text{N}^+$ ,  $\text{C}_5\text{H}_{12}\text{N}^+$ , and  $\text{NO}^+$ . Panel (b) shows  
64 sulfur-containing ions:  $\text{CHS}^+$ ,  $\text{CH}_3\text{SO}_3^+$ ,  $\text{CH}_3\text{SO}_2^+$ , and  $\text{SO}^+$ .  $\text{C}_3\text{H}_5^+$  is also shown in each  
65 plot for visual comparison

66

67 **Figure S3:** Average OA mass spectra at ambient and five heated TD temperatures. HR  
68 MS are averaged over entire MILAGRO campaign and show ion groups of  $\text{C}_x\text{H}_y^+$ ,  
69  $\text{C}_x\text{H}_y\text{O}_z^+$ ,  $\text{C}_x\text{H}_y\text{N}_z^+$ , and  $\text{C}_x\text{H}_y\text{O}_z\text{N}_w^+$  in different colors.

70

71 **Figure S4:** Thermograms of high  $m/z$  ratios for SOAR-1 (a) and MILAGRO (b)  
72 averaged into 50  $m/z$  bins. Thermograms of total OA from each campaign shown for  
73 comparison

74

75 **Figure S5:** Average SMPS size distributions from periods used in Figure 8d (high HOA,  
76 high BBOA and high OOA-2) shown as  $dV/d\log d_P$  vs mobility diameter.

77

78 **Figure S6:** Average HR MS for recombined PMF factors for SOAR-1: (a) OOA-1, (b)  
79 OOA-2, (c) OOA-3, (d) HOA, (e) LOA-AC, (f) LOA-2. Mass fraction of each ion group  
80 to total OA shown as inset table in each panel.

81

82 **Figure S7:** Average HR MS for recombined PMF factors for MILAGRO: (a)  $\text{OOA}_{\text{Total}}$   
83 (sum of OOA-1 and OOA-2), (b) OOA-1, (c) OOA-2, (d) HOA, (e) BBAO, (f) LOA.  
84 Mass fraction of each ion group to total OA shown as inset table in each panel.

85

86 **Figure S8:** Fraction of the total aerosol mass contained in each PMF component shown  
87 as a function of temperature for: (a) SOAR-1 and (b) MILAGRO.

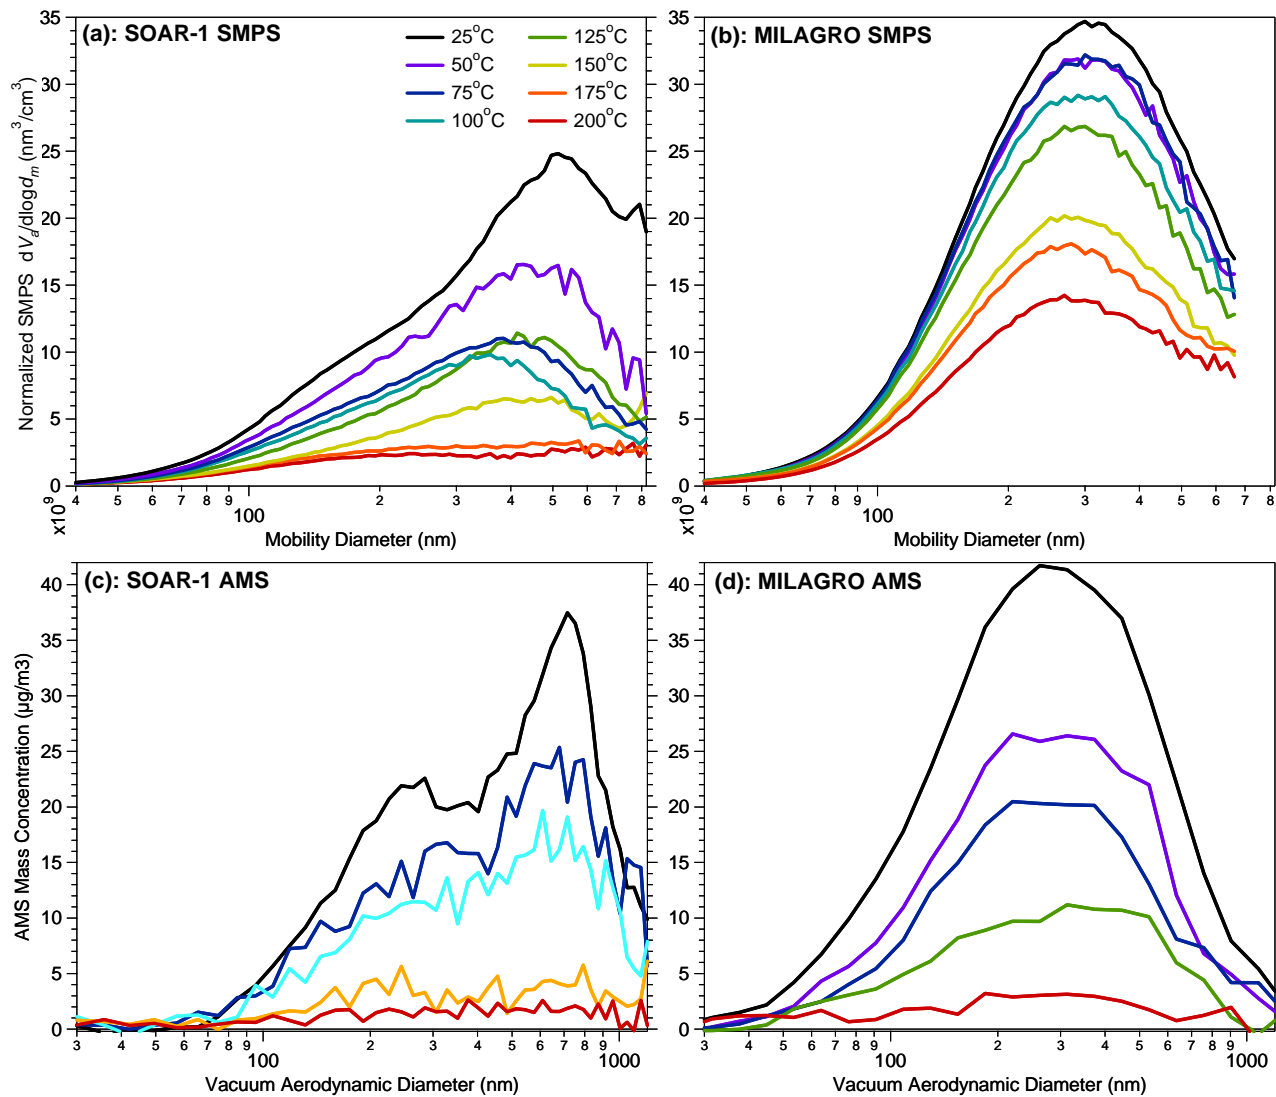

88

89 **Figure S1**

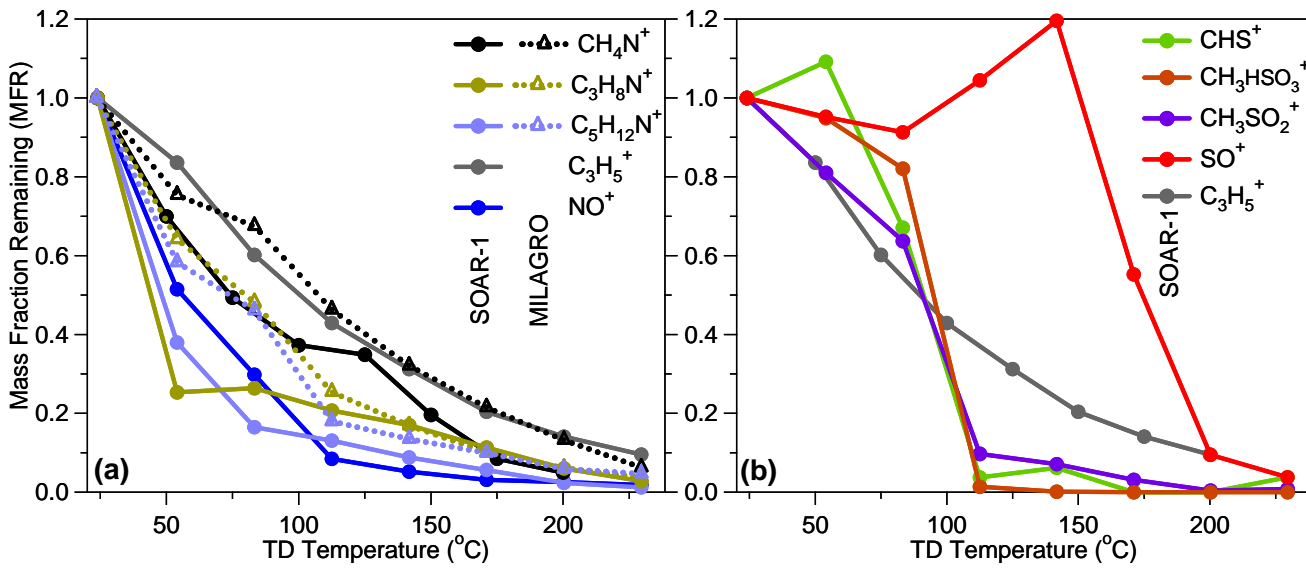

90  
91

Figure S2

92  
93  
94  
95  
96  
97  
98  
99  
100  
101  
102  
103  
104  
105  
106  
107  
108  
109  
110  
111  
112  
113  
114  
115  
116  
117  
118  
119  
120  
121  
122  
123  
124  
125  
126  
127  
128  
129  
130  
131  
132  
133  
134  
135  
136  
137

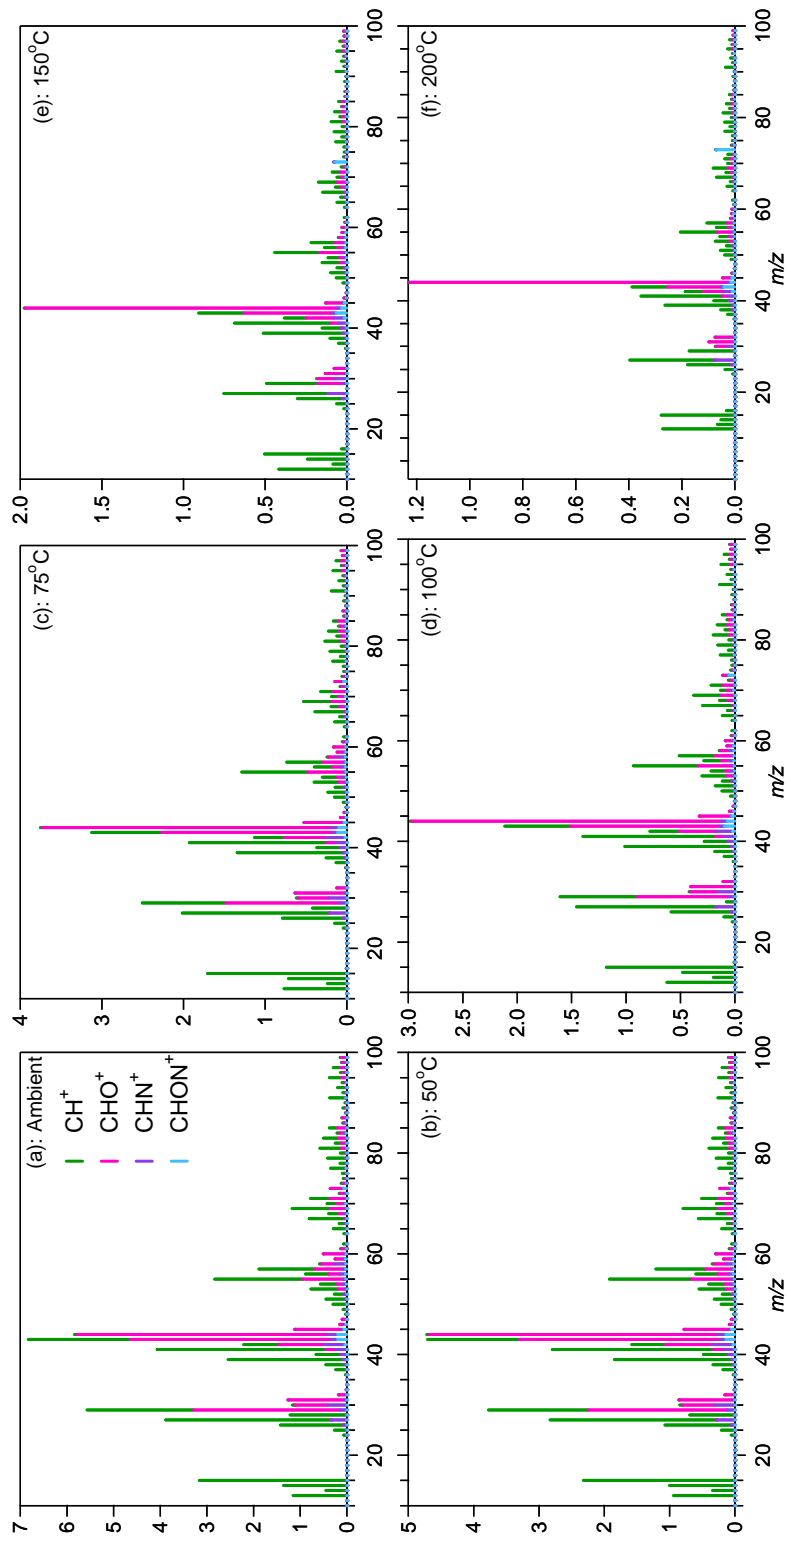

Figure S3

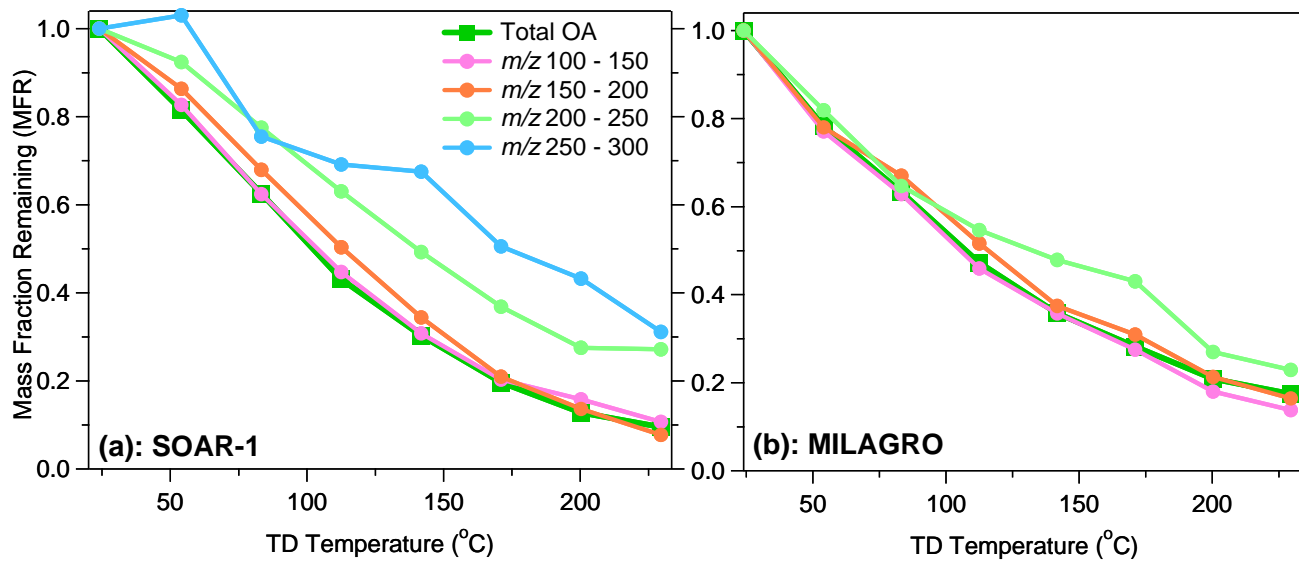

138

139 **Figure S4**



140  
141  
142  
143  
144  
145  
146  
147  
148  
149  
150  
151  
152  
153  
154  
155  
156  
157  
158  
159  
160

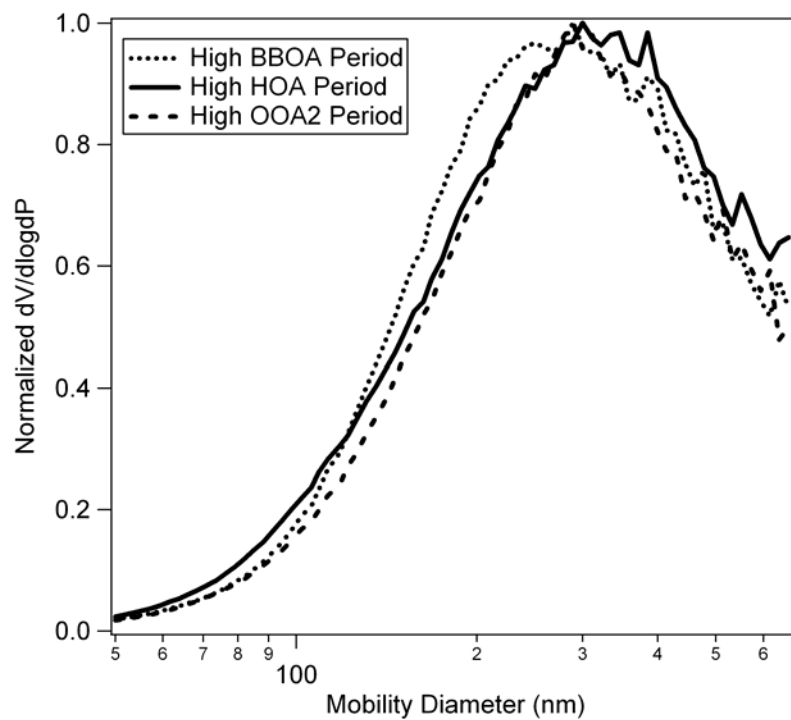

**Figure S5**

161  
 162  
 163  
 164  
 165  
 166  
 167  
 168  
 169  
 170  
 171  
 172  
 173  
 174  
 175  
 176  
 177  
 178  
 179  
 180  
 181  
 182  
 183  
 184  
 185  
 186  
 187  
 188  
 189  
 190  
 191  
 192  
 193  
 194  
 195  
 196  
 197  
 198  
 199  
 200  
 201  
 202  
 203  
 204  
 205

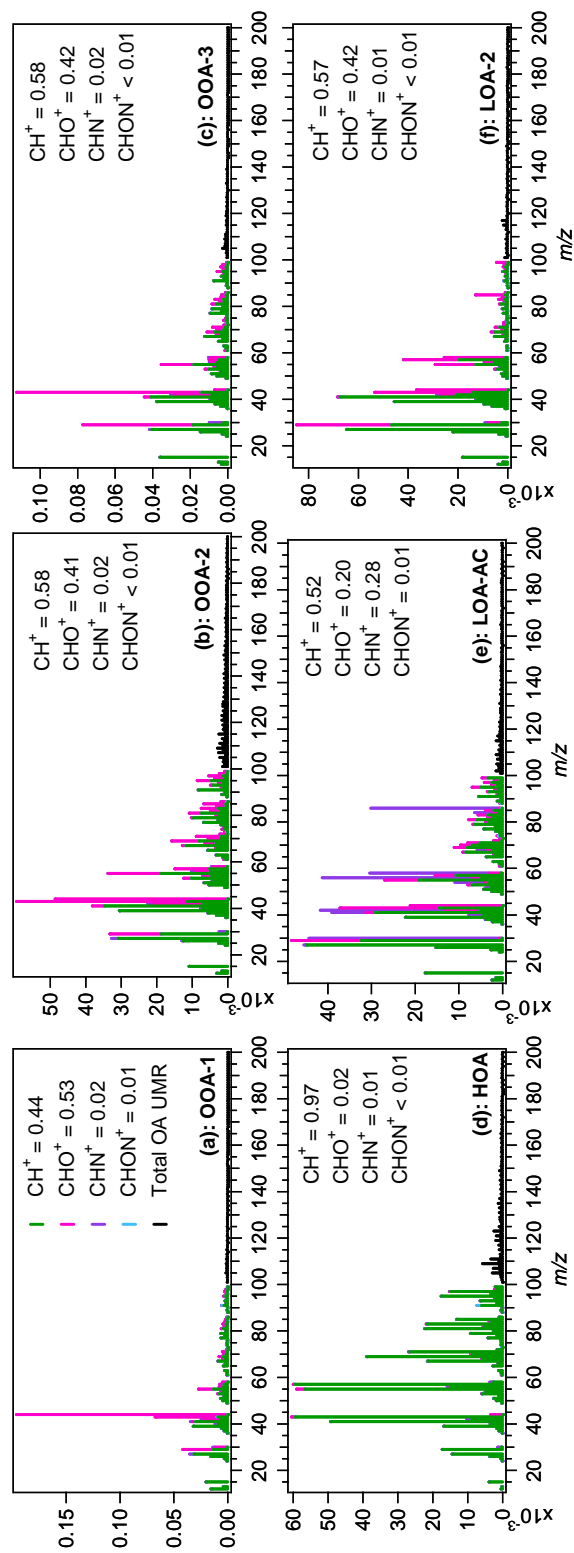

Figure S6

206  
207  
208  
209  
210  
211  
212  
213  
214  
215  
216  
217  
218  
219  
220  
221  
222  
223  
224  
225  
226  
227  
228  
229  
230  
231  
232  
233  
234  
235  
236  
237  
238  
239  
240  
241  
242  
243  
244  
245  
246  
247  
248  
249  
250  
251

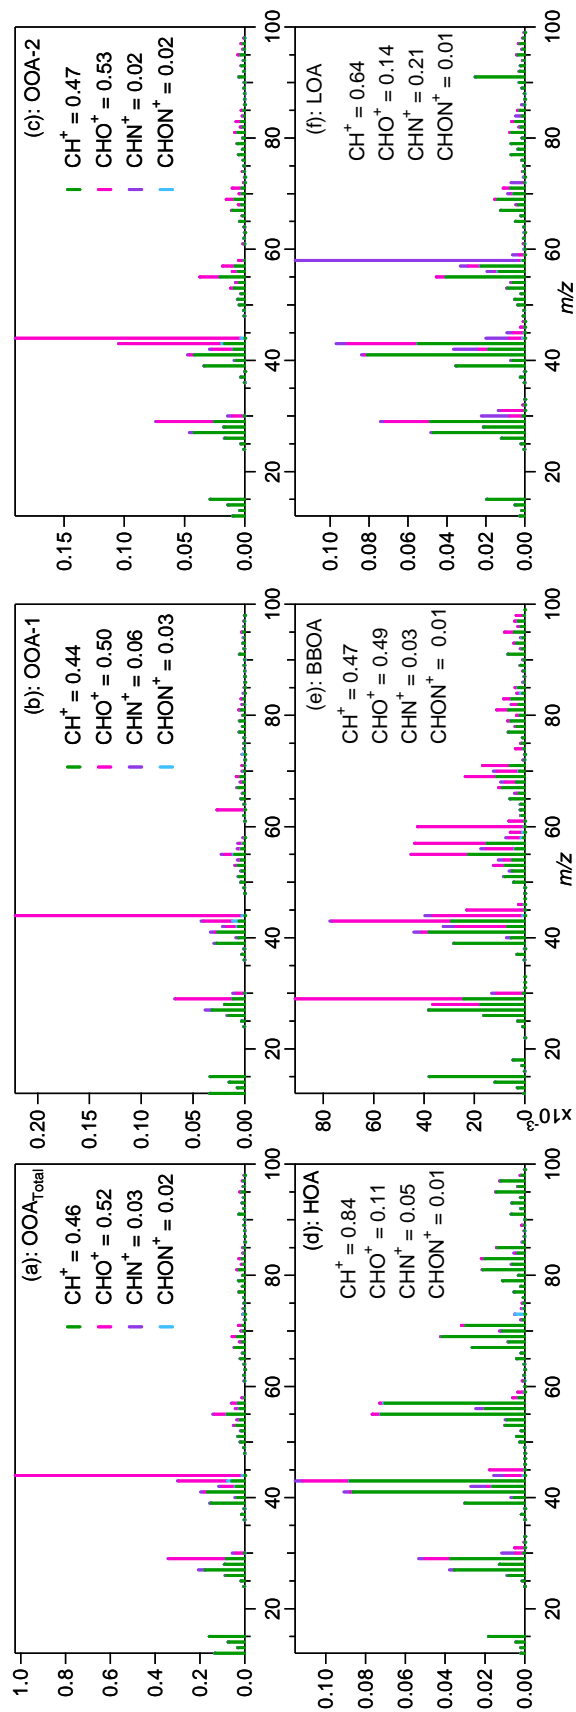

Figure S7

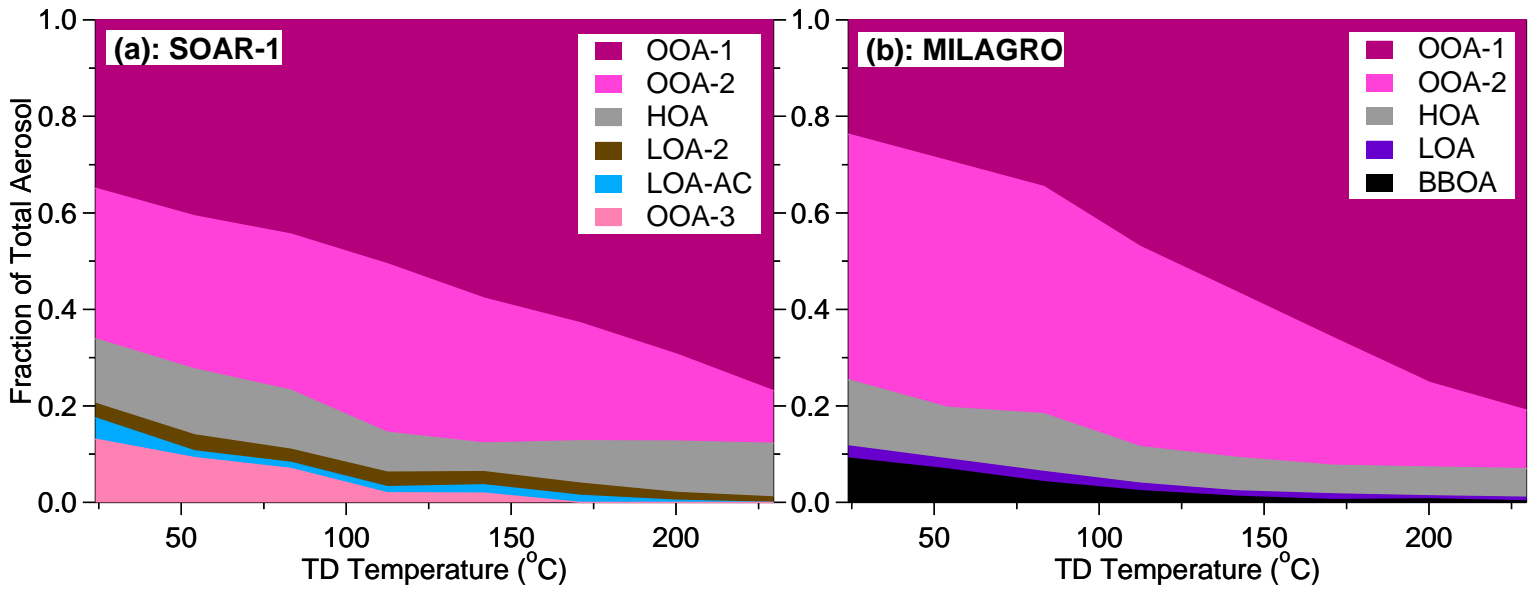

252  
 253  
 254  
 255

**Figure S8**

256 **References**  
257

- 258 Aiken, A. C., Decarlo, P. F., Kroll, J. H., Worsnop, D. R., Huffman, J. A., Docherty, K.,  
259 Ulbrich, I. M., Mohr, C., Kimmel, J. R., Sueper, D., Sun, Y., Zhang, Q., Trimborn, A.,  
260 Northway, M., Ziemann, P. J., Canagaratna, M. R., Onasch, T. B., Alfarra, M. R., Prevot,  
261 A., Dommen, J., Duplissy, J., Metzger, A., Baltensperger, U. and Jimenez, J. L.: O/C and  
262 OM/OC Ratios of Primary, Secondary, and Ambient Organic Aerosols with a High  
263 Resolution Time-of-Flight Aerosol Mass Spectrometer, *Environmental Science &*  
264 *Technology*, 42, 4478-4485, 10.1021/es703009q, 2008.
- 265 Lanz, V. A., Alfarra, M. R., Baltensperger, U., Buchmann, B., Hueglin, C. and Prevot, A.  
266 S. H.: Source apportionment of submicron organic aerosols at an urban site by factor  
267 analytical modelling of aerosol mass spectra, *Atmospheric Chemistry and Physics*, 7,  
268 1503-1522, 2007.
- 269 Nemitz, E., Jimenez, J. L., Huffman, J. A., Canagaratna, M. R., Worsnop, D. R. and  
270 Guenther, A. B.: An Eddy-Covariance System for the Measurement of Surface /  
271 Atmosphere Exchange Fluxes of Submicron Aerosol Chemical Species - First  
272 Application Above an Urban Area, *Aerosol Science and Technology*, 42, 636-657, 2008.
- 273 Robinson, A. L., Donahue, N. M., Shrivastava, M. K., Weitkamp, E. A., Sage, A. M.,  
274 Grieshop, A. P., Lane, T. E., Pierce, J. R. and Pandis, S. N.: Rethinking organic aerosols:  
275 Semivolatile emissions and photochemical aging, *Science*, 315, 1259-1262, 2007.
- 276 Ulbrich, I. M., Canagaratna, M. R., Zhang, Q., Worsnop, D. R. and Jimenez, J. L.:  
277 Interpretation of organic components from Positive Matrix Factorization of aerosol mass  
278 spectrometric data, *Atmospheric Chemistry and Physics*, 9, 2891-2918, 2009.
- 279 Zhang, Q., Alfarra, M. R., Worsnop, D. R., Allan, J. D., Coe, H., Canagaratna, M. R. and  
280 Jimenez, J. L.: Deconvolution and quantification of hydrocarbon-like and oxygenated  
281 organic aerosols based on aerosol mass spectrometry, *Environmental Science &*  
282 *Technology*, 39, 4938-4952, 2005a.
- 283 Zhang, Q., Worsnop, D. R., Canagaratna, M. R. and Jimenez, J. L.: Hydrocarbon-like and  
284 oxygenated organic aerosols in Pittsburgh: insights into sources and processes of organic  
285 aerosols, *Atmospheric Chemistry and Physics*, 5, 3289-3311, 2005b.  
286  
287
